# Supplementary material for: Caveolin-mediated cytosolic delivery of spike nanoparticle enhances antitumor immunity of neoantigen vaccine for hepatocellular carcinoma
Source: PubMed Central journal article supplement (PMC10405843; doi:10.7150/thno.85843), 2023-07-16
Supplement: thnov13p4166s1.pdf [file thnov13p4166s1.pdf]

## Supplementary information

### **Caveolin-mediated cytosolic delivery of spike nanoparticle enhances antitumor immunity of neoantigen vaccine for hepatocellular carcinoma**

Zhiwen Lin<sup>1, 2#</sup>, Chenwei Jiang<sup>1, 2#</sup>, Peiyuan Wang<sup>3#</sup>, Qingjing Chen<sup>1</sup>, Bing Wang<sup>1</sup>, Xinyue Fu<sup>1</sup>, Yuzhi Liang<sup>1, 5</sup>, Da Zhang<sup>1, 4\*</sup>, Yongyi Zeng<sup>1, 2\*</sup>, Xiaolong Liu<sup>1, 3, 4\*</sup>

<sup>1</sup>. The United Innovation of Mengchao Hepatobiliary Technology Key Laboratory of Fujian Province, Mengchao Hepatobiliary Hospital of Fujian Medical University, Fuzhou 350025, P. R. China

<sup>2</sup>. Liver Disease Center, The First Affiliated Hospital of Fujian Medical University, Fuzhou 350005, People's Republic of China

<sup>3</sup>. CAS Key Laboratory of Design and Assembly of Functional Nanostructures, Fujian Institute of Research on the Structure of Matter, Chinese Academy of Sciences, Fuzhou 350002, P. R. China

<sup>4</sup>. Mengchao Med-X Center, Fuzhou University, Fuzhou 350116, P. R. China

<sup>5</sup>. Fujian Agriculture and Forestry University, Fuzhou 350002, P. R. China

#These authors contributed equally to this paper

\*Corresponding authors:

E-mail addresses: Prof. Da Zhang ([zdluoman1987@163.com](mailto:zdluoman1987@163.com)), Prof. Yongyi Zeng ([lamp197311@126.com](mailto:lamp197311@126.com)) and Prof. Xiaolong Liu ([xiaoloong.liu@gmail.com](mailto:xiaoloong.liu@gmail.com)).

**Table S1.** Encapsulation efficiency and loading capacity of NeoAgs and ODN-1826 in V-scVLPs and SPS, respectively.

| scVLPs                | NeoAgs | ODN-1826 |
|-----------------------|--------|----------|
| Entrapment efficiency | 91.8%  | 76.6%    |
| Loading efficiency    | 31.46% | 4.57%    |

| SPS                   | NeoAgs | ODN-1826 |
|-----------------------|--------|----------|
| Entrapment efficiency | 63.1%  | 38.8%    |
| Loading efficiency    | 23.98% | 2.37%    |

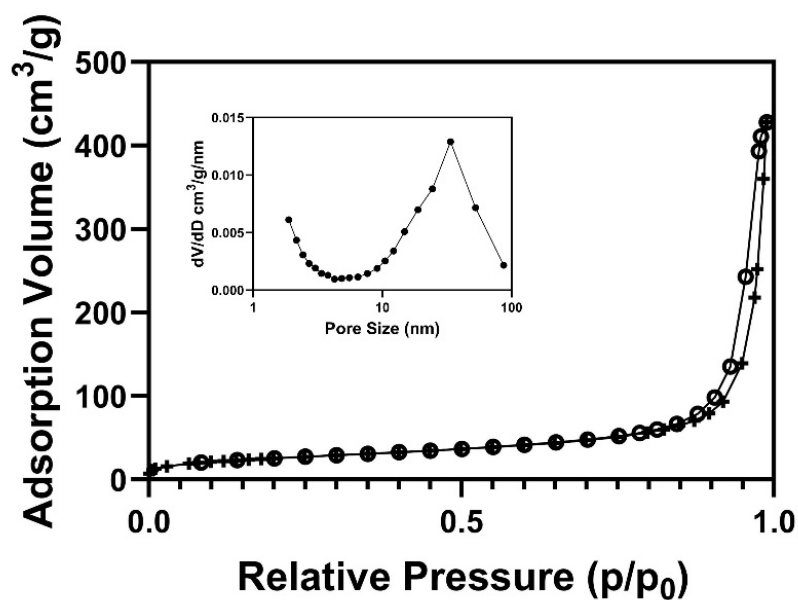

**Figure. S1.** N<sub>2</sub> sorption isotherm for scVLPs and DFT pore size distribution for scVLPs.

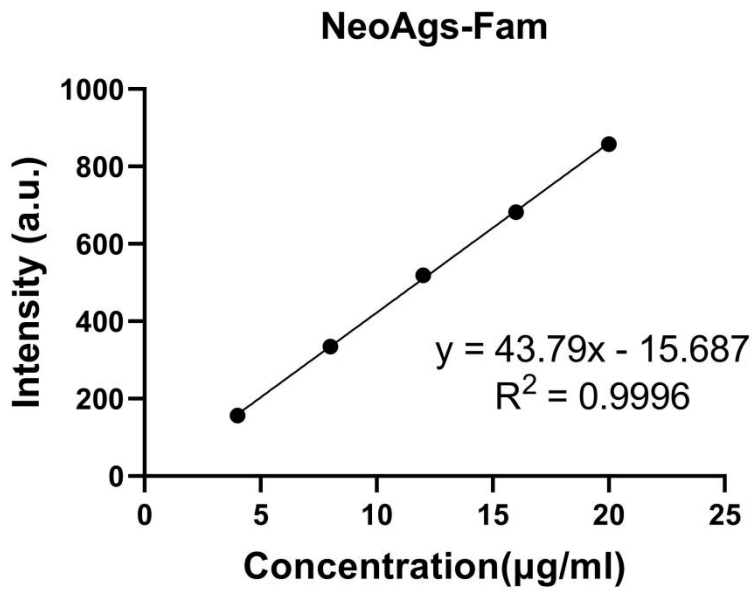

**Figure. S2.** The concentration of NeoAgs from scVLPs (<sup>FAM</sup>-NeoAgs) was quantified according to the linear fit ( $Y = 43.79x - 15.687$ ,  $R^2 = 0.9996$ ) of fluorescence intensity at 520 nm, the correlation curve was prepared from 4.0~20.0 µg/mL.

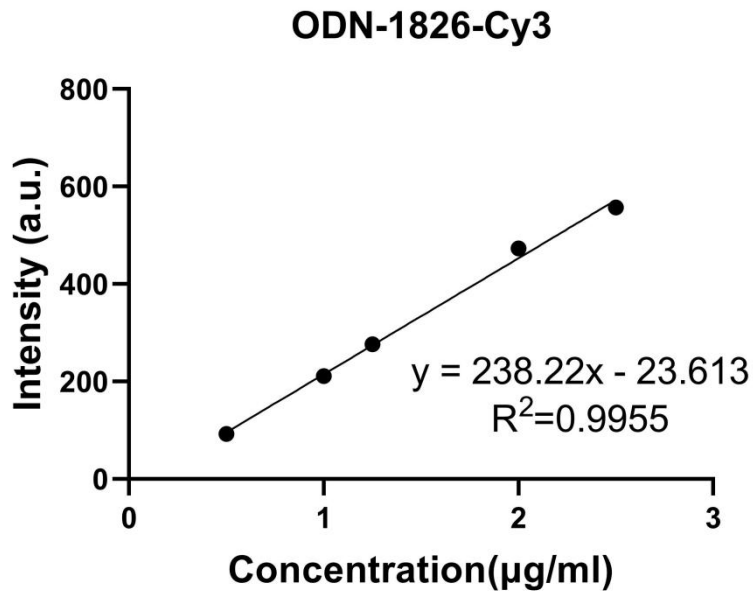

**Figure. S3.** The concentration of ODN-1826 from scVLPs was quantified according to the linear fit ( $Y = 238.22x - 23.613$ ,  $R^2 = 0.9955$ ) of fluorescence intensity at 570 nm, the correlation curve was prepared from 0.5~2.5 µg/mL.

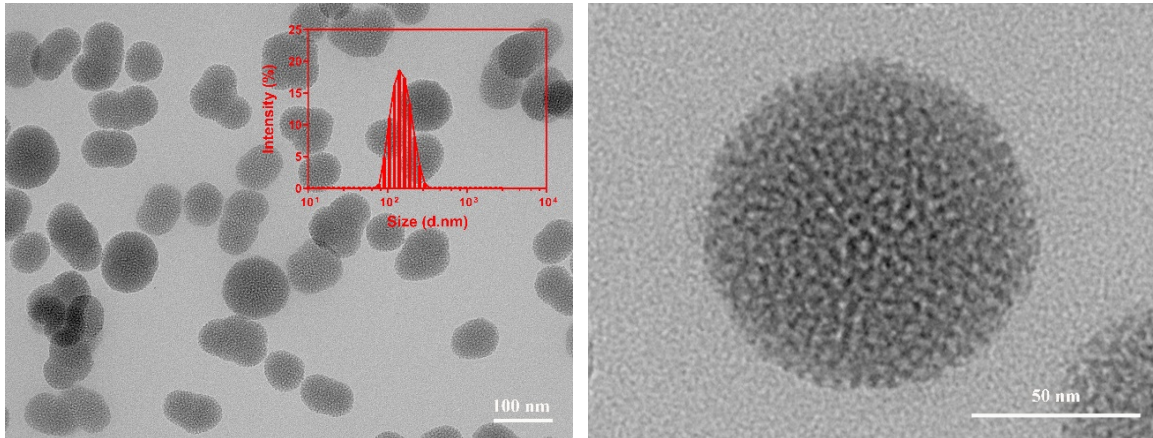

**Figure. S4.** TEM image of SPS.

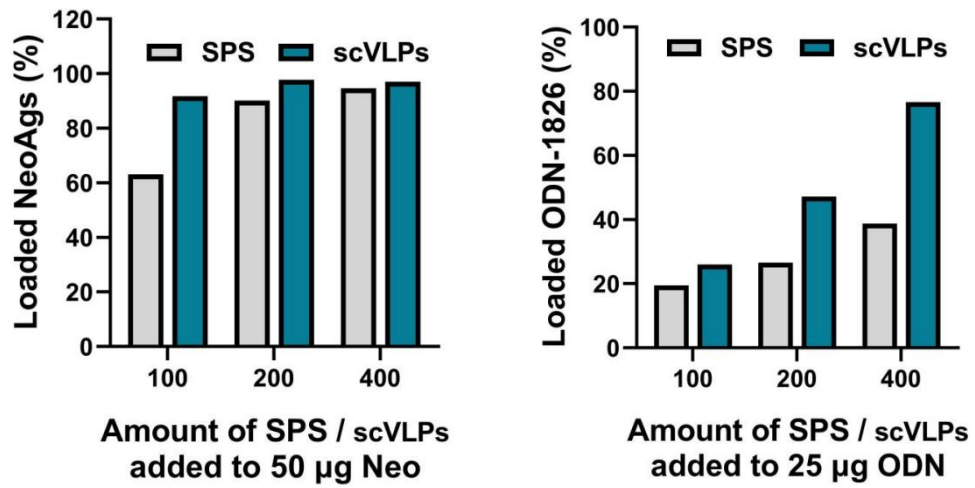

**Figure. S5.** The loading percentage of NeoAgs and ODN-1826 in SPS or scVLPs, respectively.

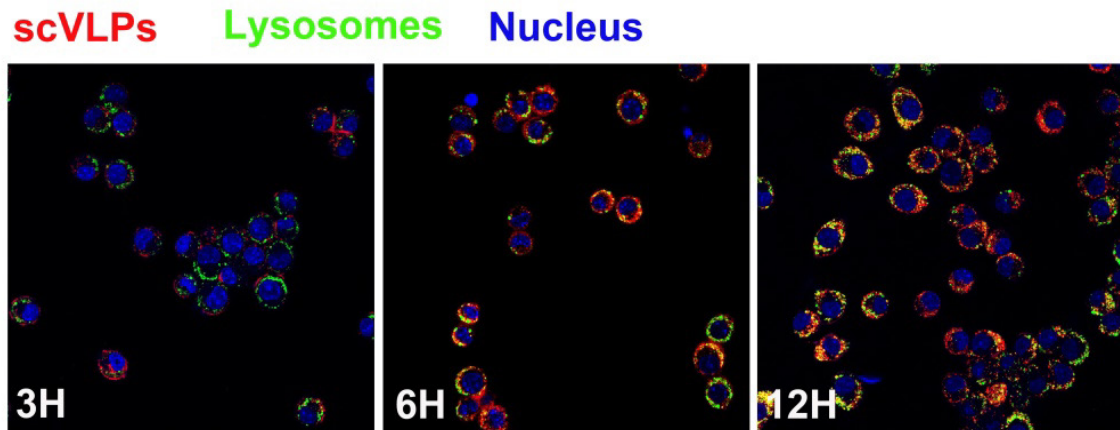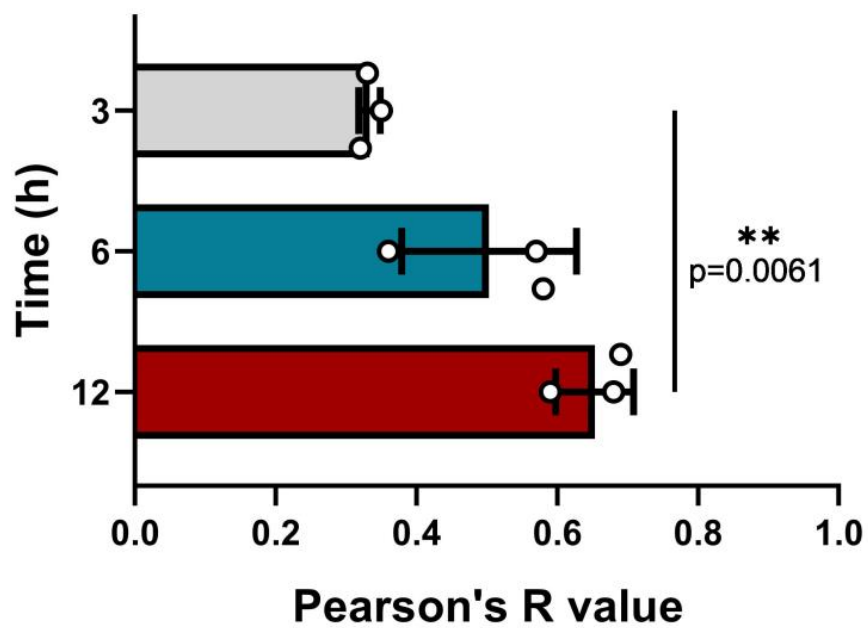

**Figure. S6.** PCCs of Cy5 labeled scVLPs with lysosomes at different incubation times, (n=3). The statistical analysis was performed with ANOVA analysis, \* $p < 0.05$ , \*\* $p < 0.01$ , \*\*\* $p < 0.001$ , \*\*\*\* $p < 0.0001$ , (n = 3). Data are presented as mean  $\pm$  SD.

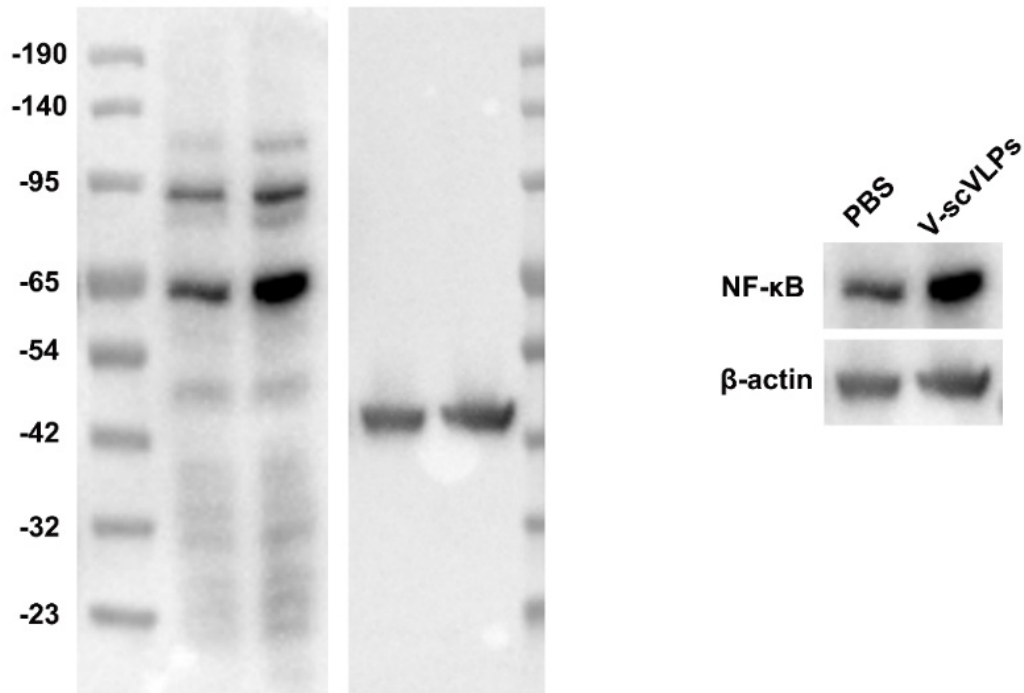

**Figure. S7.** Western blot analysis of NF-κB in BMDCs after co-incubation with V-scVLPs for 48 h, and PBS treated cell were used as control.

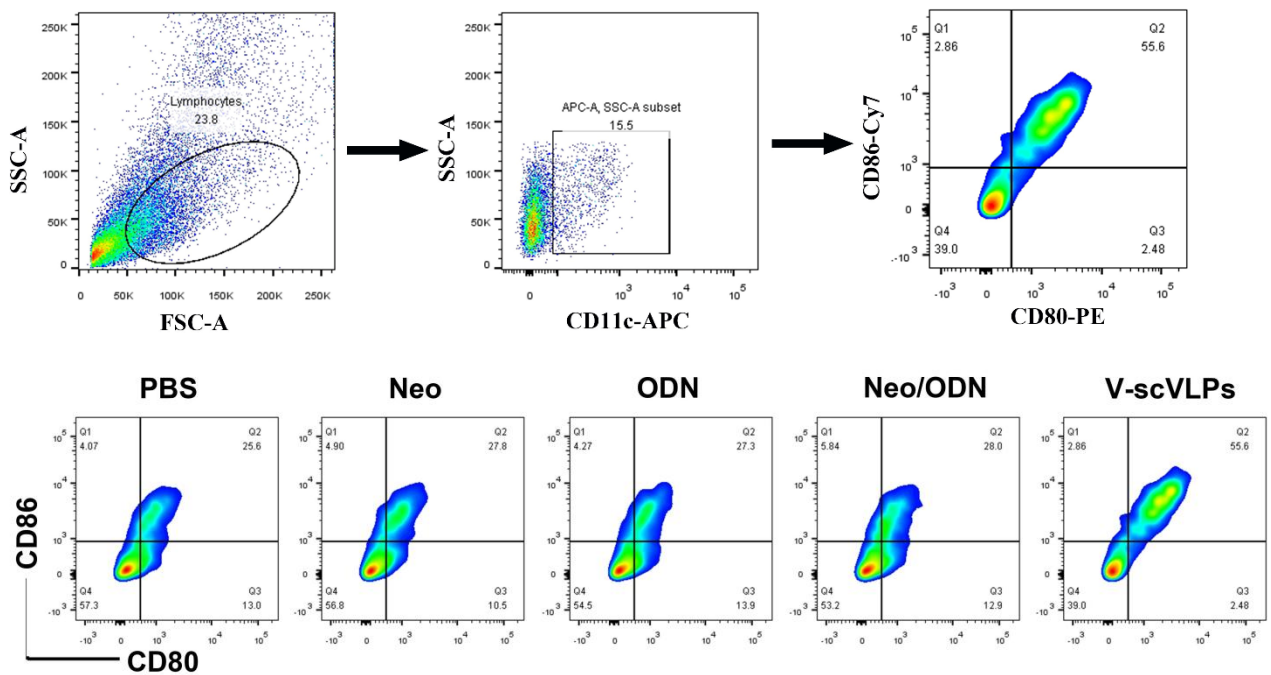

**Figure. S8.** Identify the maturation of BMDCs after receiving different treatment through FACS with staining anti-CD11c-APC, anti-CD80-PE, and anti-CD86-PE-Cy7 antibodies.

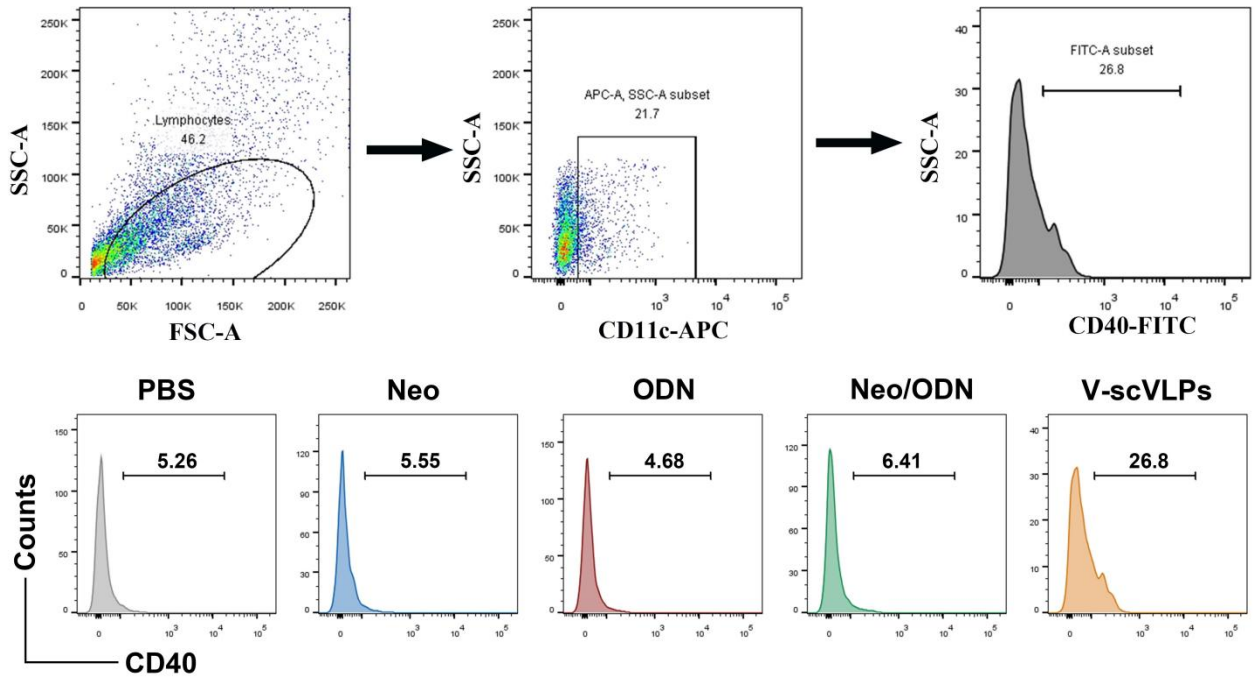

**Figure. S9.** Identify the maturation of BMDCs after receiving different treatment through FACS with staining anti-CD11c-APC, anti-CD40-FITC antibodies.

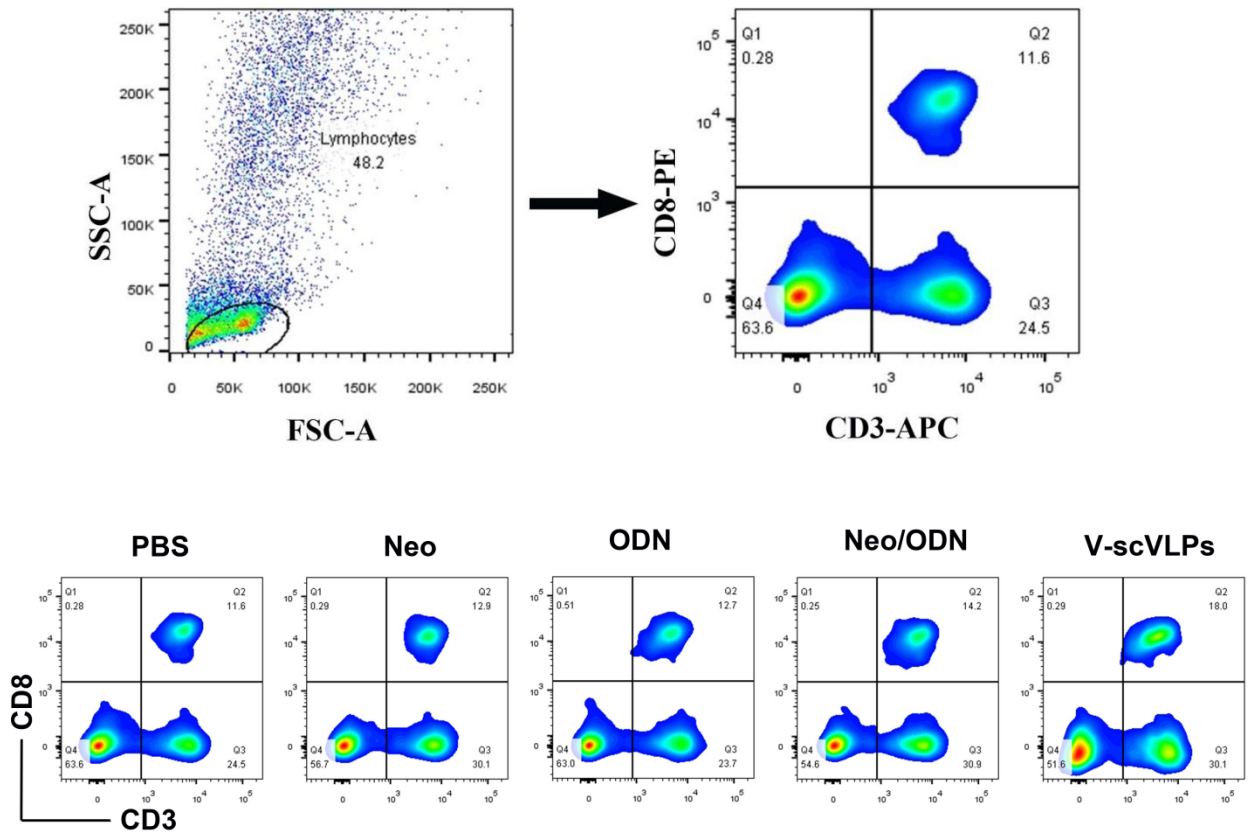

**Figure. S10.** Identify the population of T cells after receiving different treatment through FACS with staining anti-CD3-APC, anti-CD8-PE antibodies.



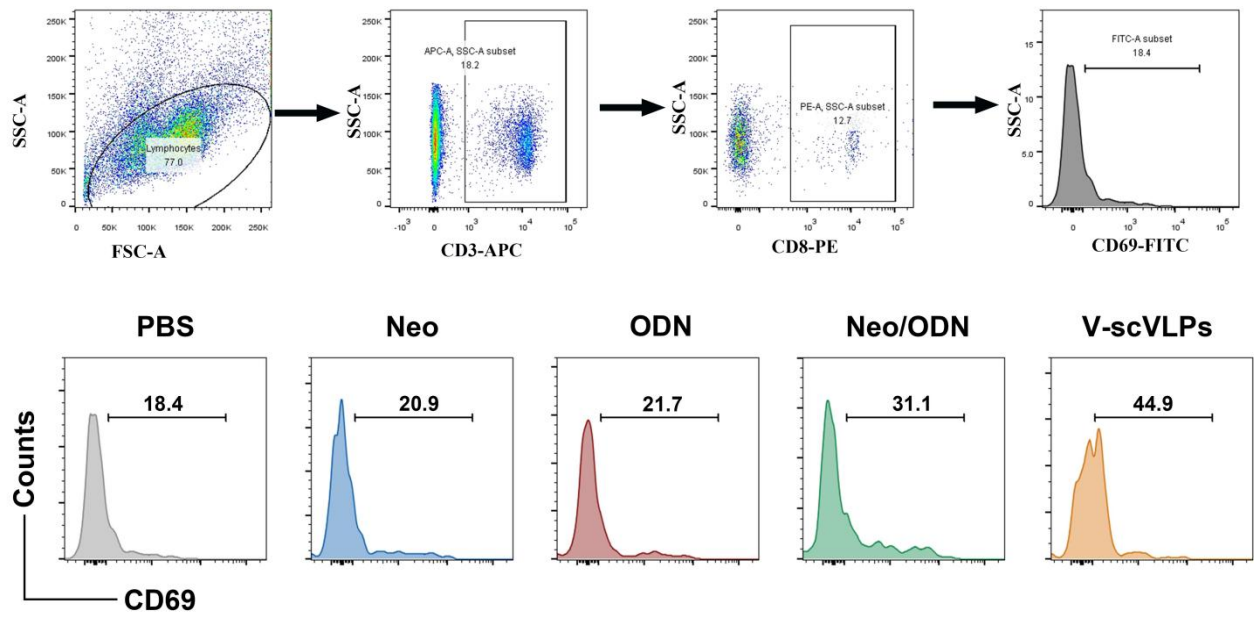

**Figure. S11.** Identify the activation of T cells after receiving different treatment through FACS with staining anti-CD3-APC, anti-CD8-PE and anti-CD69-FITC antibodies.

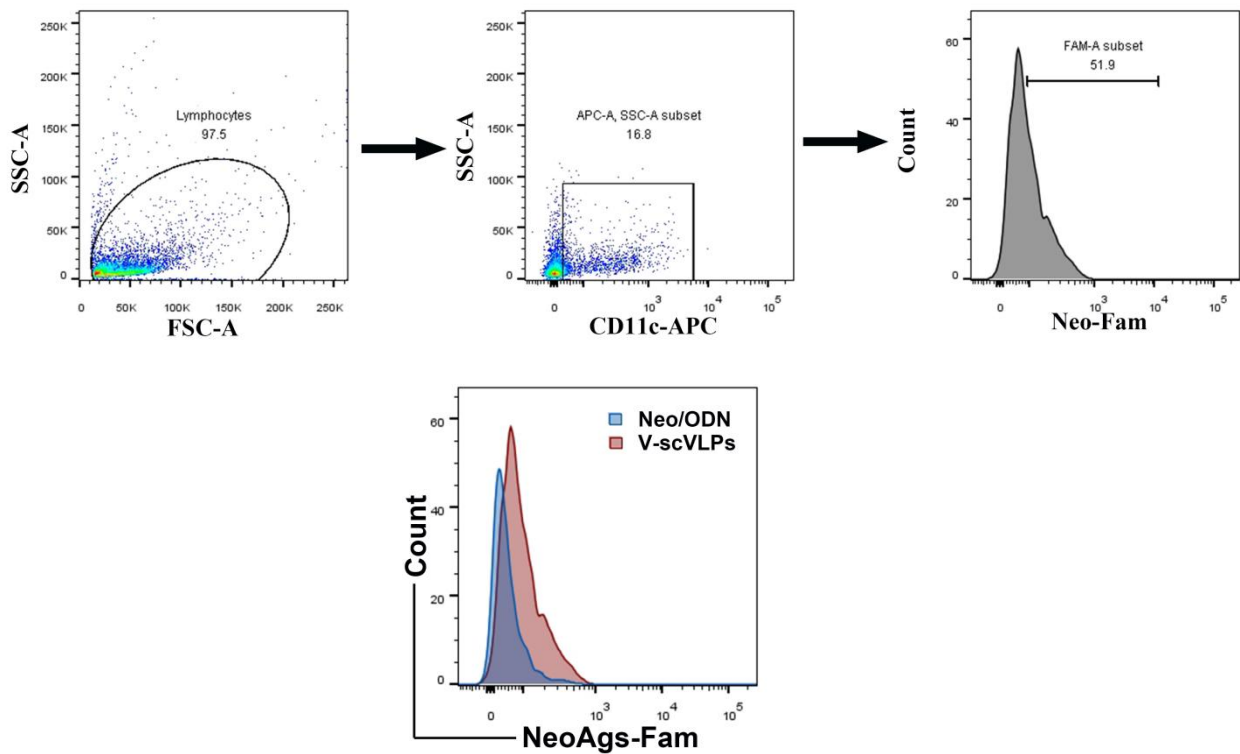

**Figure. S12.** Representative fluorescence intensity of <sup>FAM</sup>NeoAg<sub>s</sub> positive cells gated on DCs in lymph node after 12h of Neo/ODN and scVLPs injection.

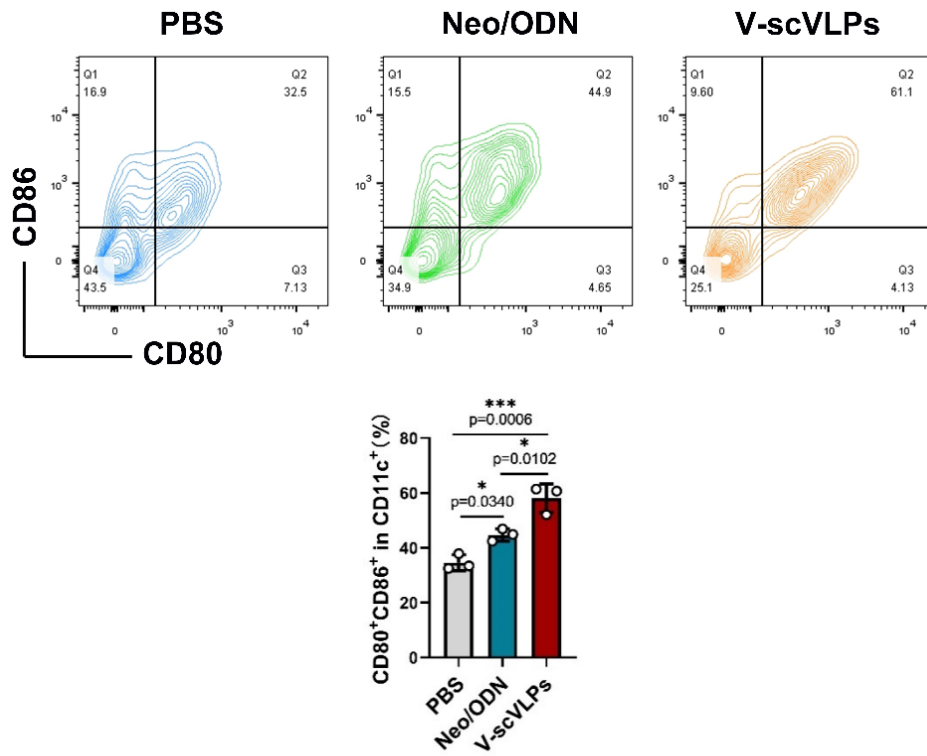

**Figure. S13.** Identify the maturation of DCs in LNs after receiving different treatment through FACS with staining anti-CD11c-APC, and anti-80-PE and anti-86-PECy7 antibodies.

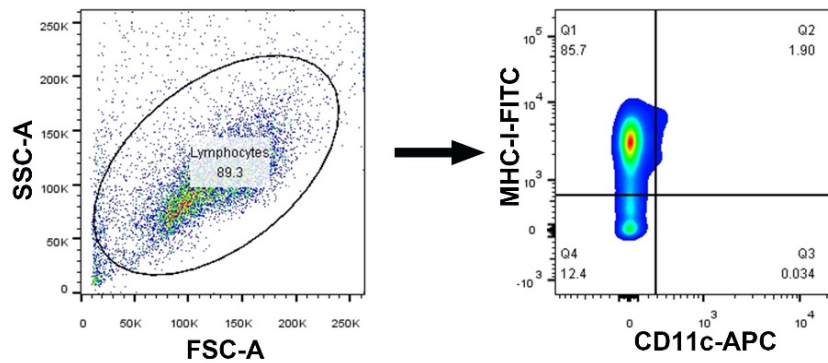

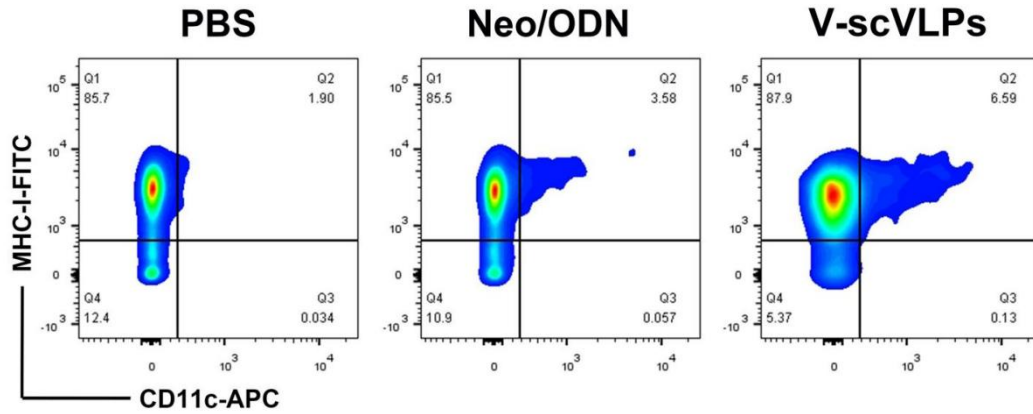

**Figure. S14.** Identify the maturation of DCs in LNs after receiving different treatment through FACS with staining anti-CD11c-APC, and anti-MHC-I-PE antibodies.

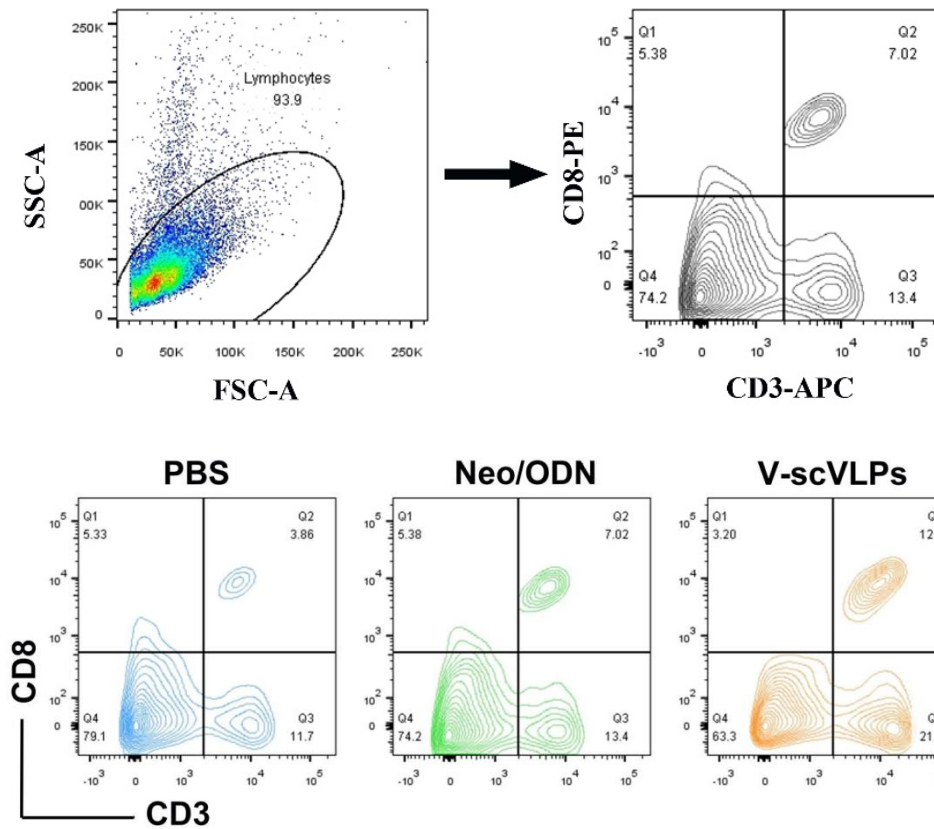

**Figure. S15.** Identify the CD8<sup>+</sup>T cells in spleen after receiving different treatment through FACS with staining anti-CD3-APC and anti-CD8-PE antibodies.

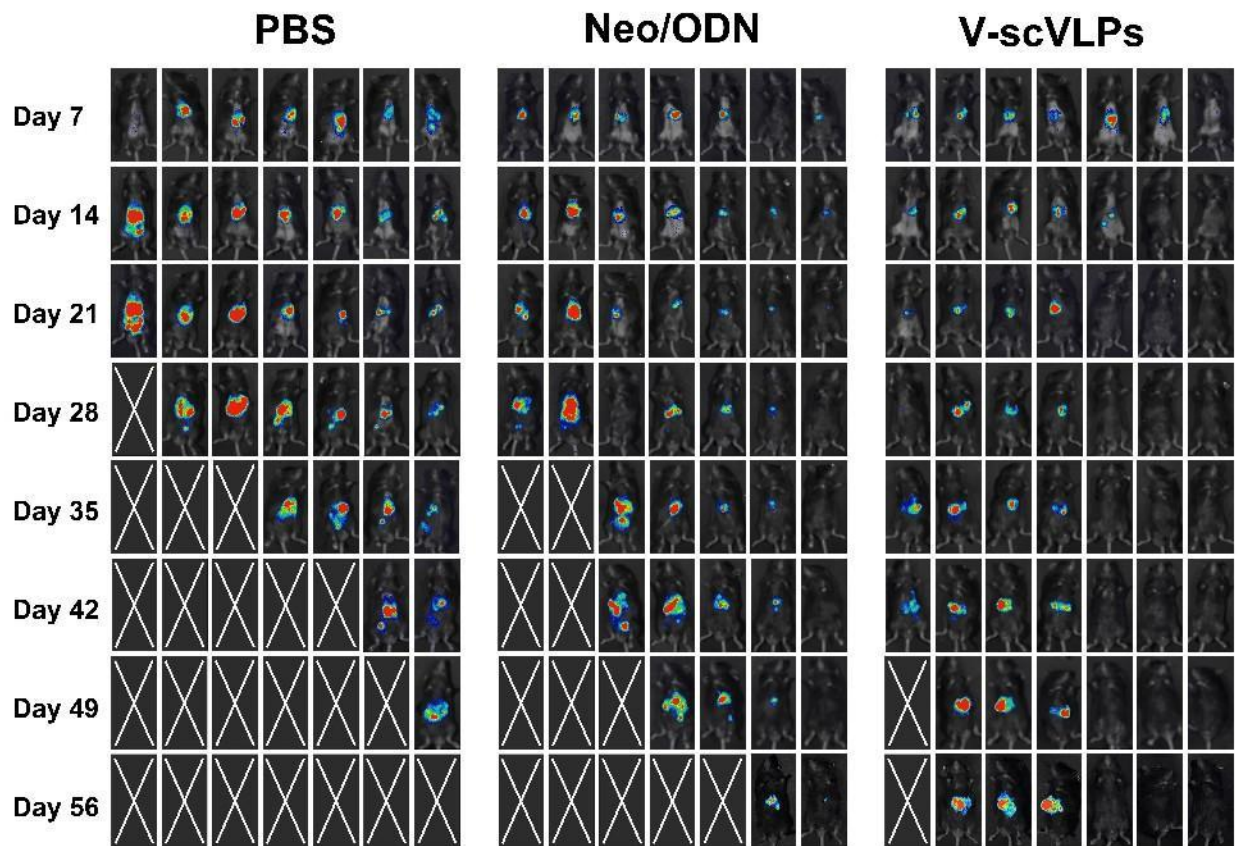

**Figure. S16.** Bioluminescence imaging of mice at the 7, 14, 21, 28, 35, 42, 49 and 56 days before and after receiving different treatments as indicated, n = 7.

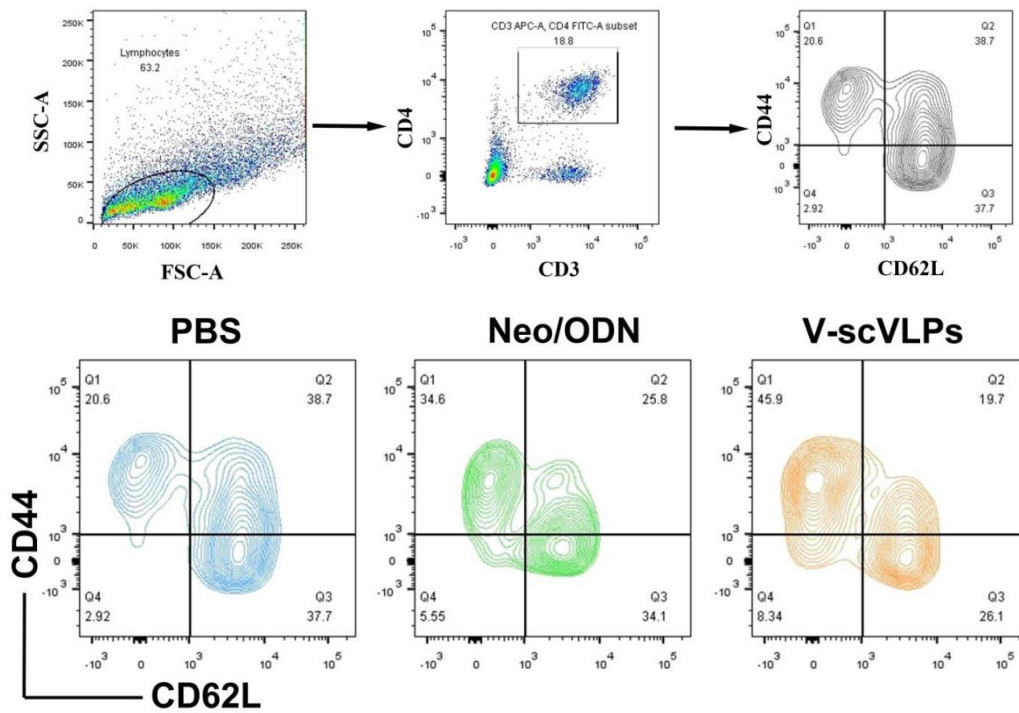

**Figure. S17.** Identify the CD3<sup>+</sup>CD4<sup>+</sup>CD44<sup>+</sup>CD62L<sup>+</sup>T cells in the spleen after receiving different treatments through FACS with staining anti-CD3-APC, anti-CD4-FITC antibodies, anti-CD44-PE-Cy7 and anti-CD62-PerCP-Cy5.5 antibodies.

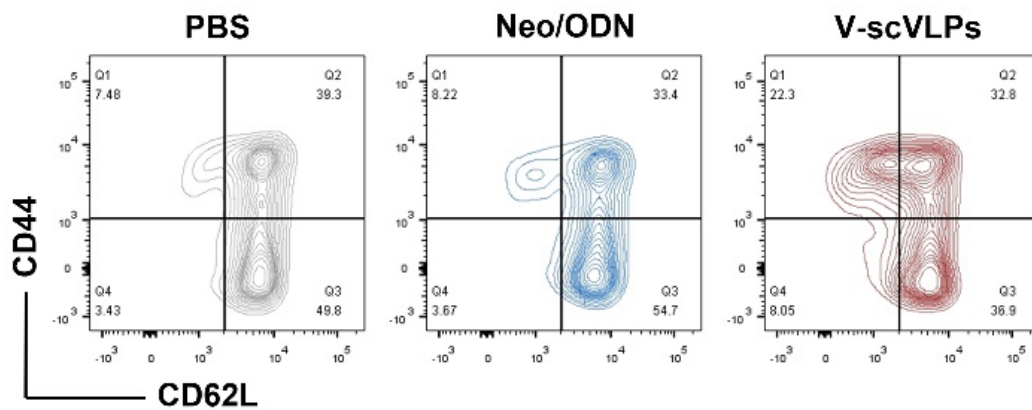

**Figure. S18.** Identify the CD3<sup>+</sup>CD8<sup>+</sup>CD44<sup>+</sup>CD62L<sup>+</sup>T cells in the spleen after receiving different treatments through FACS with staining anti-CD3-APC, anti-CD8-PE antibodies, anti-CD44-PE-Cy7 and anti-CD62-PerCP-Cy5.5 antibodies.

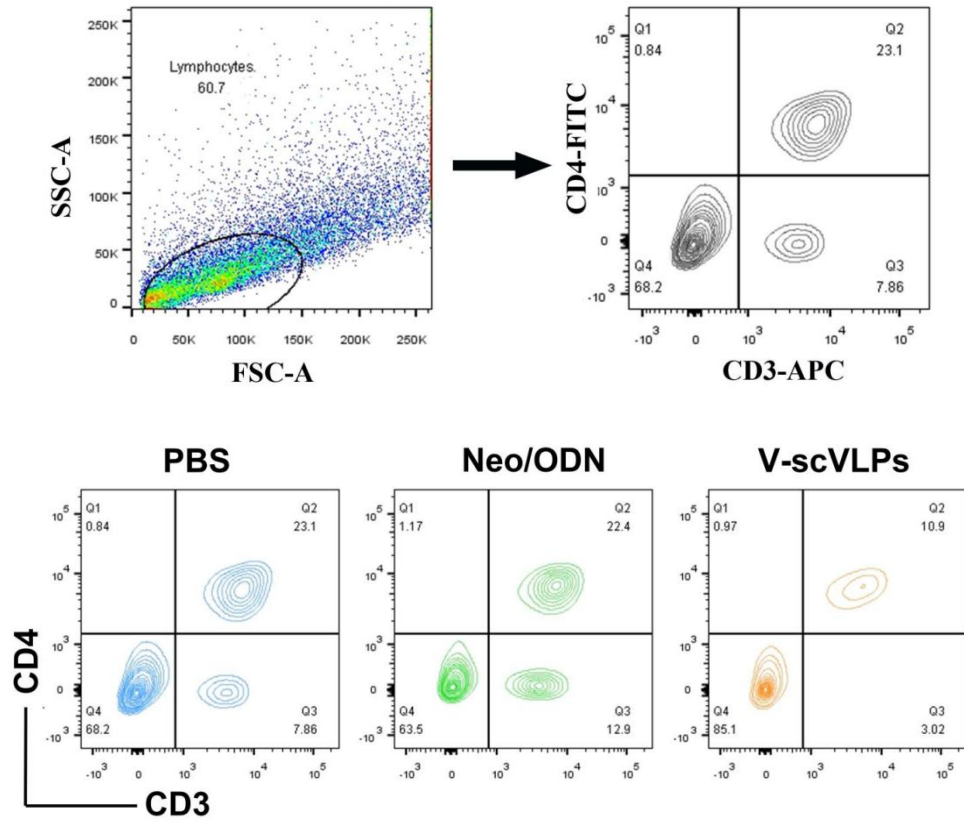

**Figure. S19.** Identify the CD3<sup>+</sup>CD4<sup>+</sup>T cells in the spleen after receiving different treatments through FACS with staining anti-CD3-APC and anti-CD4-FITC antibodies.



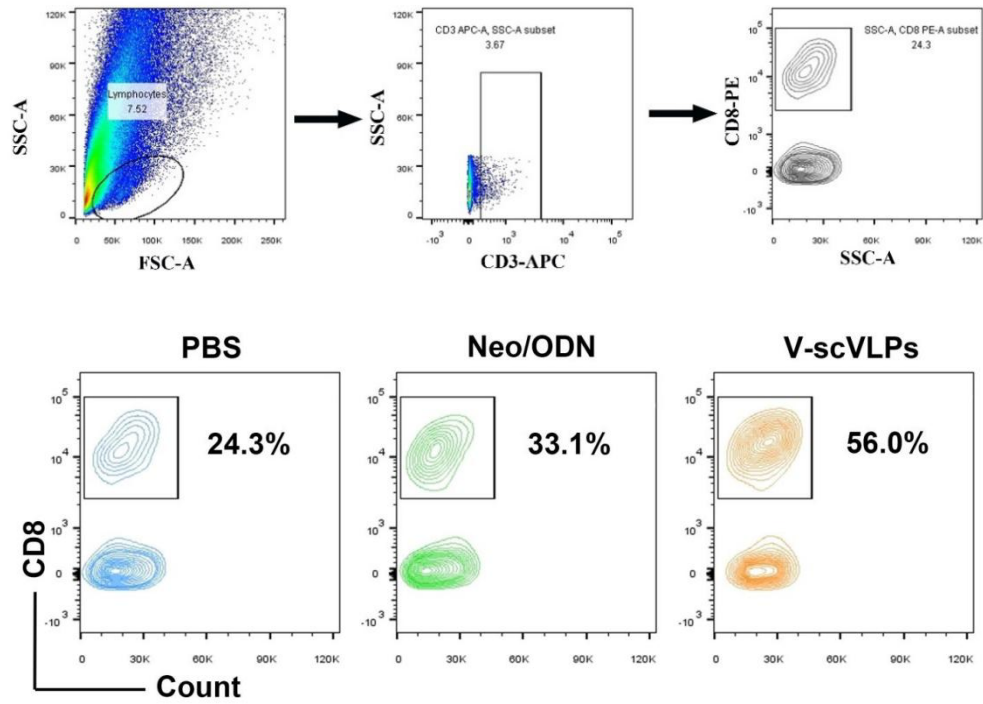

**Figure. S20.** Identify the CD8<sup>+</sup>T cells in tumor after receiving different treatment through FACS with staining anti-CD3-APC and anti-CD8-PE antibodies.

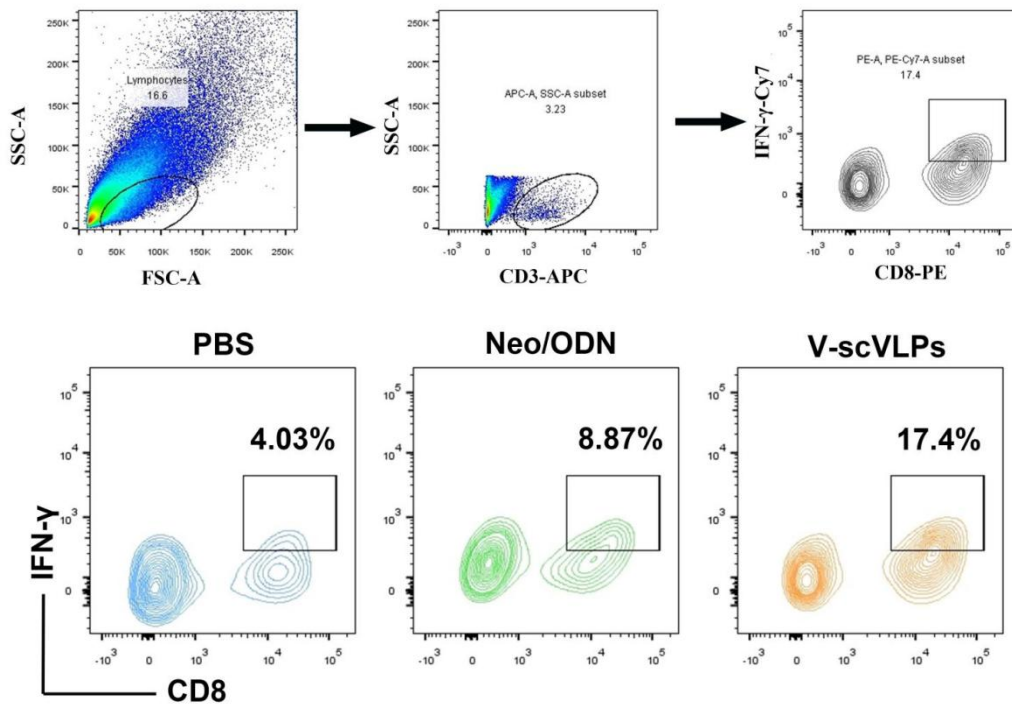

**Figure. S21.** Identify different types of IFN- $\gamma$ <sup>+</sup>CD8<sup>+</sup>CD3<sup>+</sup>T cells in tumors after receiving different treatments through FACS with staining anti-CD3-APC, anti-CD8-PE, IFN- $\gamma$ - PE-Cy7 antibodies.

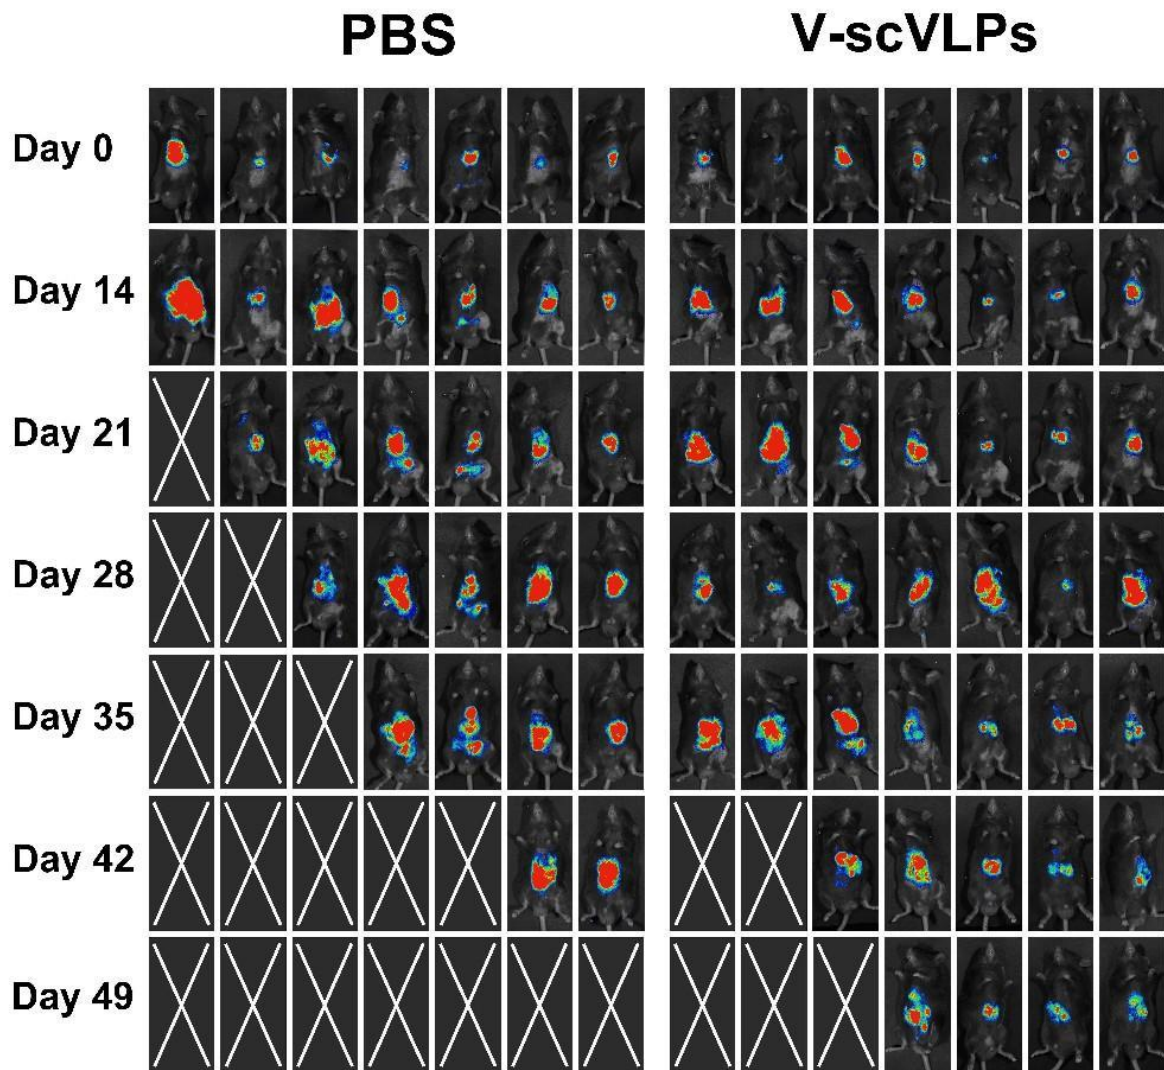

**Figure. S22.** Bioluminescence imaging of mice at the day 0, 14, 21, 28, 35,42 and 49 after receiving different treatments as indicated, n = 7.



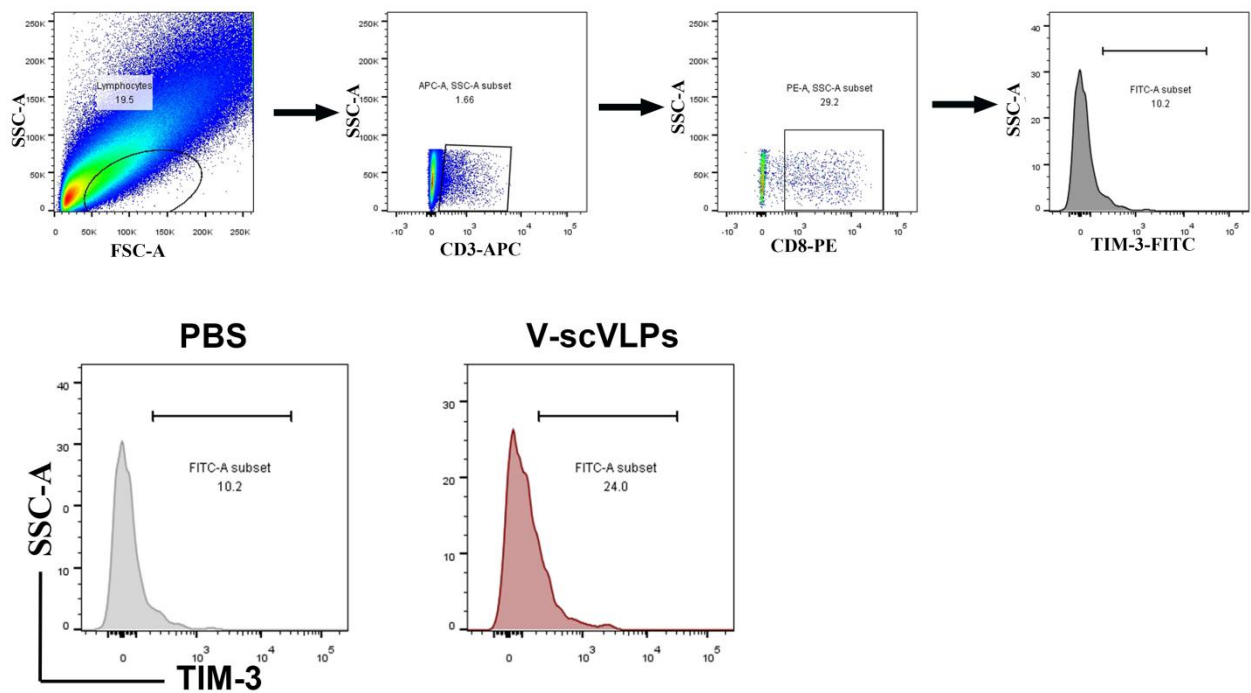

**Figure. S23.** Identify the different types of TIM-3<sup>+</sup>CD8<sup>+</sup>CD3<sup>+</sup>T cells in tumors after receiving different treatments by FCM with staining anti-CD3-APC, anti-CD8-PE, TIM-3-FITC antibodies.

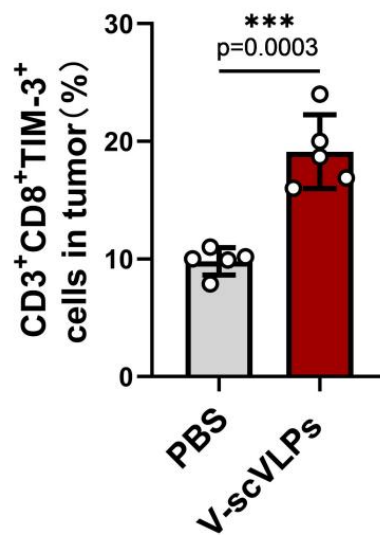

**Figure. S24.** The percentage of CD3<sup>+</sup>CD8<sup>+</sup>TIM-3<sup>+</sup>T cells in orthotopic tumors after receiving different treatment as indicated, n = 5. Statistical analysis was performed with T test, \* $p < 0.05$ , \*\* $p < 0.01$ , \*\*\* $p < 0.001$ , \*\*\*\* $p < 0.0001$ . Data are expressed as mean  $\pm$  SD.

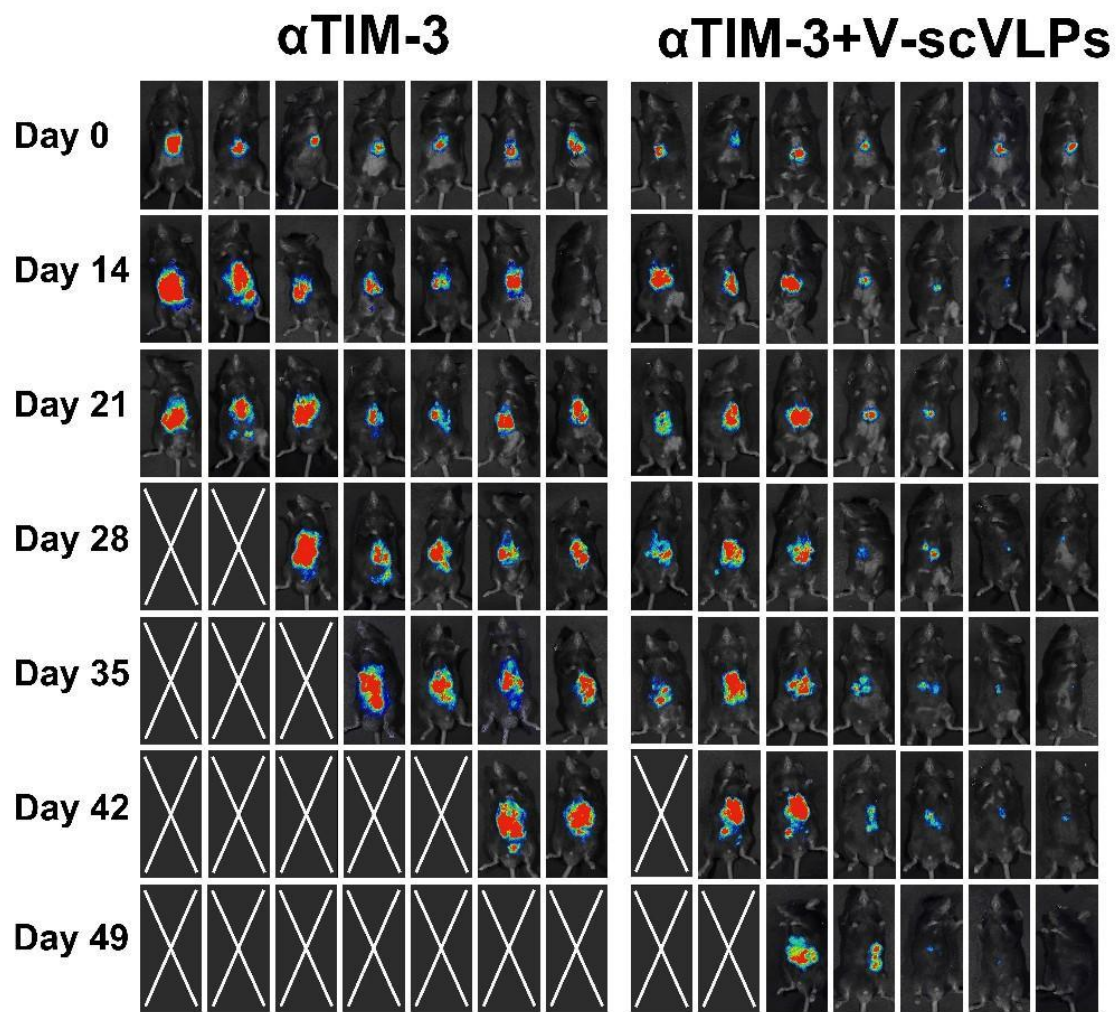

**Figure. S25.** Bioluminescence imaging of mice at the day 0, 14, 21, 28, 35,42 and 49 before and after receiving different treatments as indicated, n = 7.

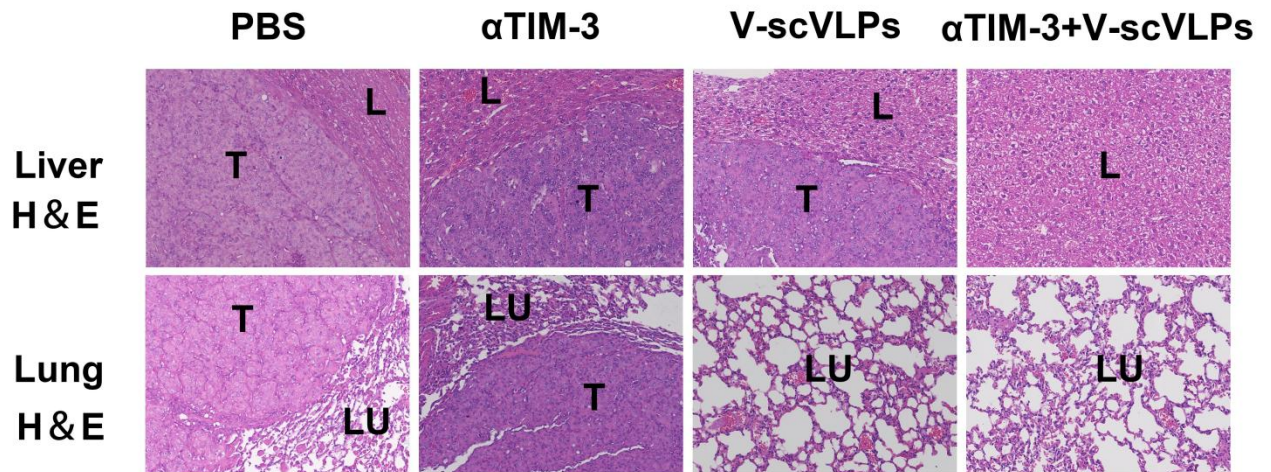

**Figure. S26.** The H&E staining of liver and lung tissues after receiving different treatments at the 49th day.

T represents tumor tissues, L was liver tissues, and Lu was lung tissues.

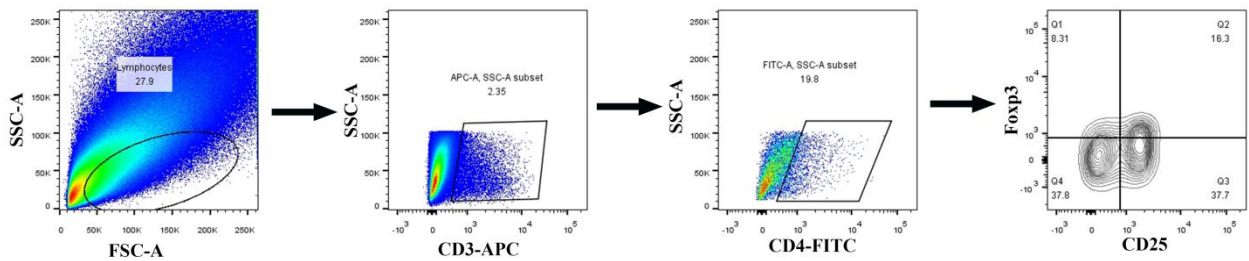

**Figure. S27.** Identify the different types of  $CD3^+CD4^+CD25^+Foxp3^+$ T cells in tumors after receiving different treatments by FCM with staining anti-CD3-APC, anti-CD8-PE, TIM-3-FITC antibodies.

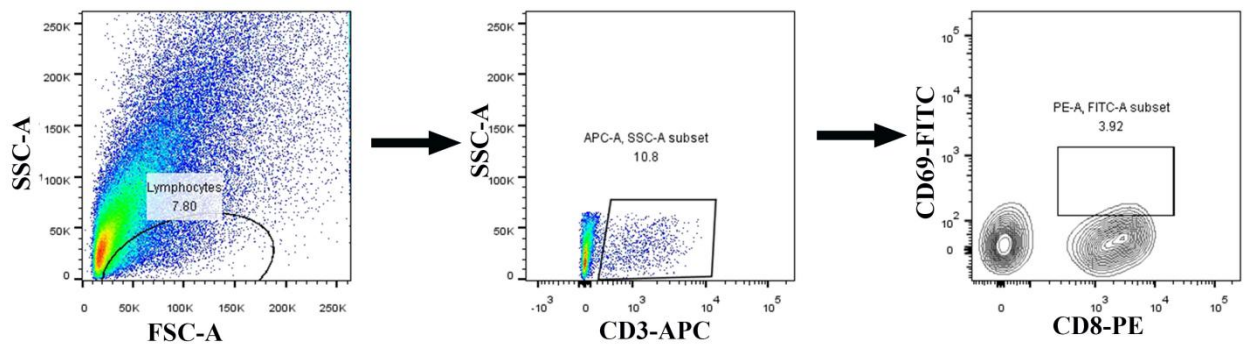

**Figure. S28.** Identify the different types of  $CD3^+CD8^+CD69^+$ T cells in tumors after receiving different treatments by FCM with staining anti-CD3-APC, anti-CD8-PE, CD69-FITC antibodies.

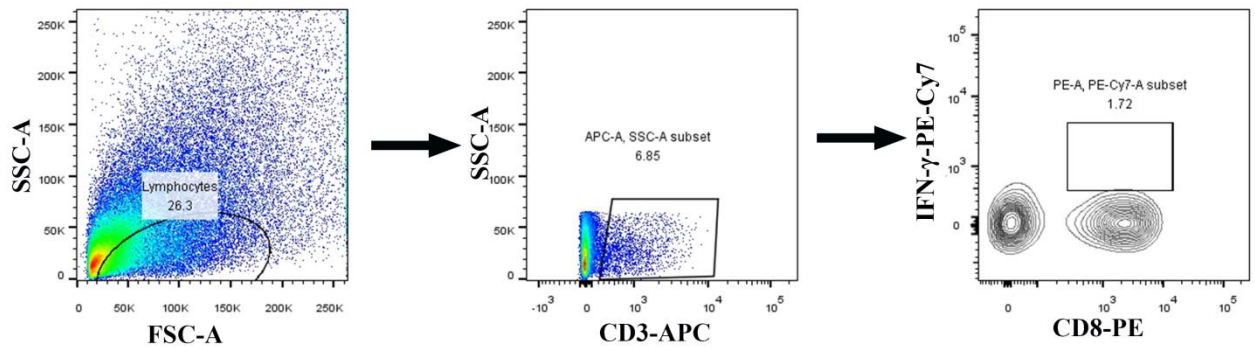

**Figure. S29.** Identify the different types of  $CD3^+CD8^+IFN-\gamma^+$ T cells in tumors after receiving different treatments by FCM with staining anti-CD3-APC, anti-CD8-PE, IFN- $\gamma$ -PE-Cy7 antibodies.

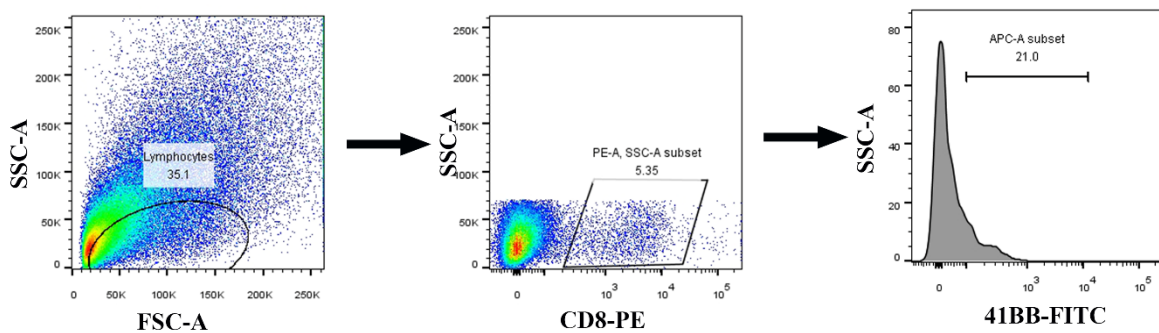

**Figure. S30.** Identify the different types of  $CD8^+41BB^+$ T cells in tumors after receiving different treatments by FCM with staining anti-CD8-PE, 41BB-FITC antibodies.



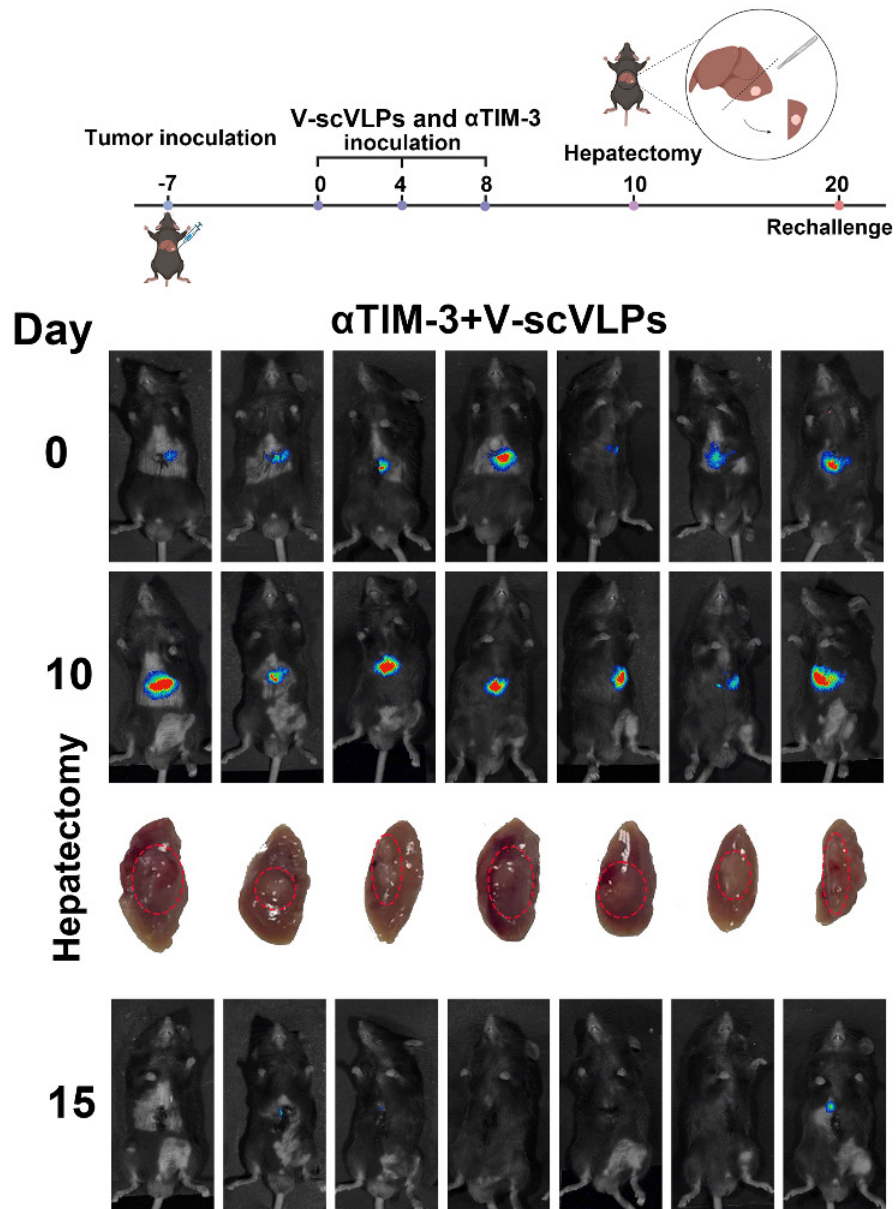

**Figure. S31.** Bioluminescence imaging of mice at the day 0, 10, 15 and photographs of orthotopic liver tumors and their H&E staining that excised from mice after inoculation Hepa1-6 tumor cells for 10 days, n = 7.

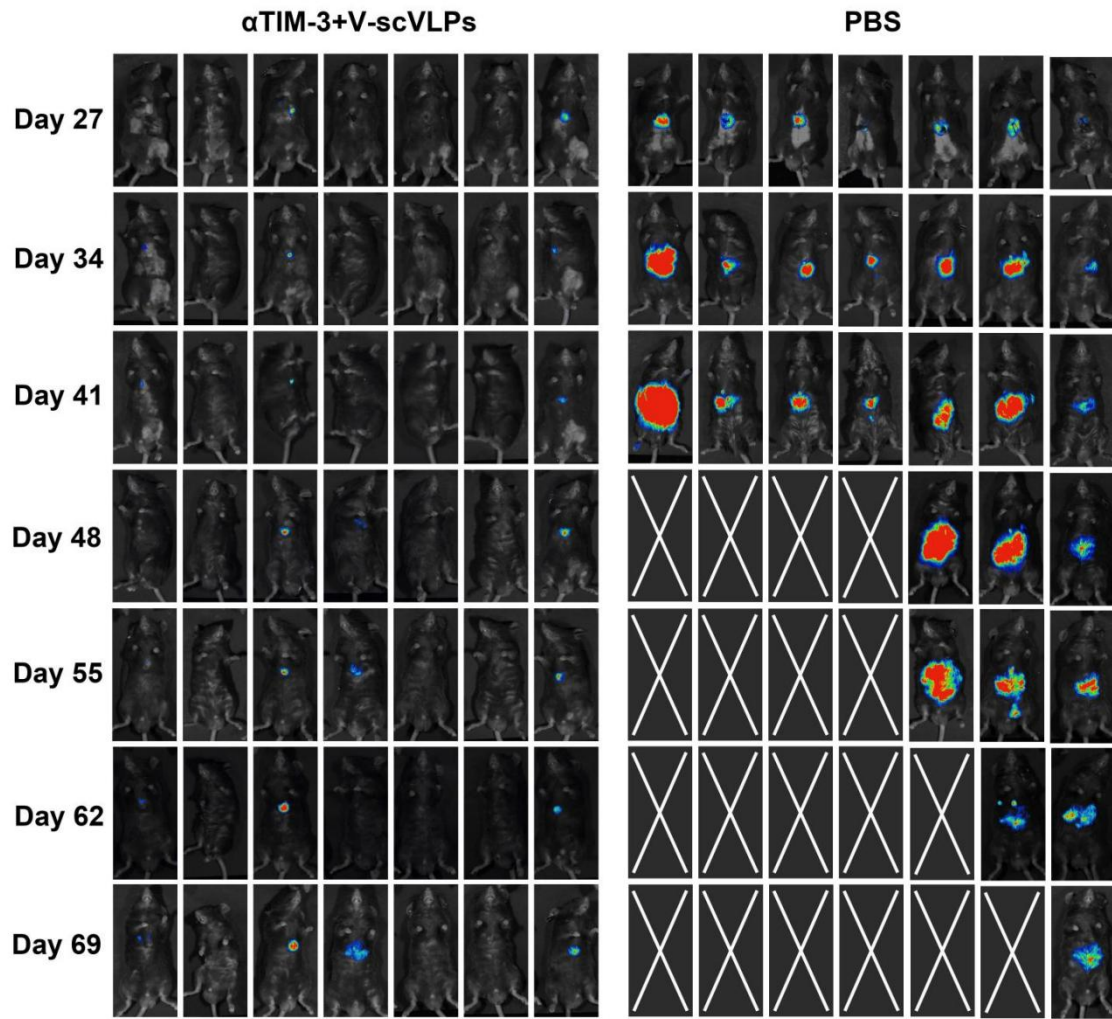

**Figure. S32.** Bioluminescence imaging of mice at the day 27, 34, 41, 48, 55, 62 and 69 after rechallenge as indicated, n = 7.

**$\alpha$ TIM-3+V-scVLPs**

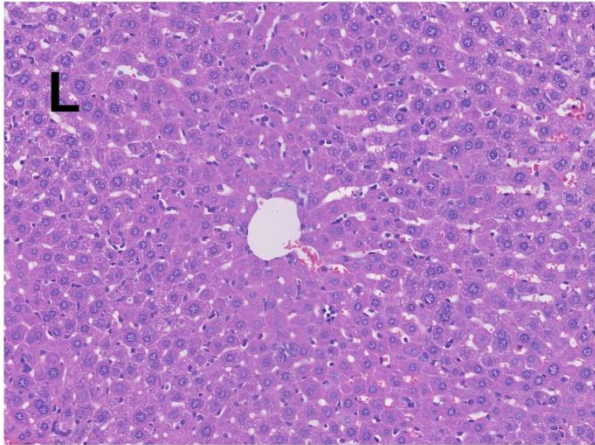

**PBS**

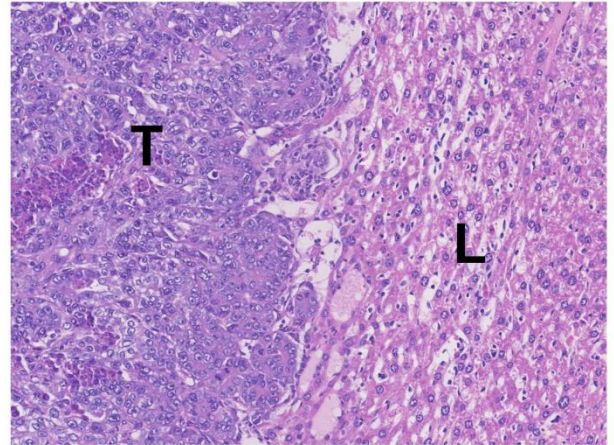

**Figure. S33.** The H&E staining of liver tissues and tumors after receiving different treatments at the day 69 day. T represents tumor tissues, L was liver tissues.

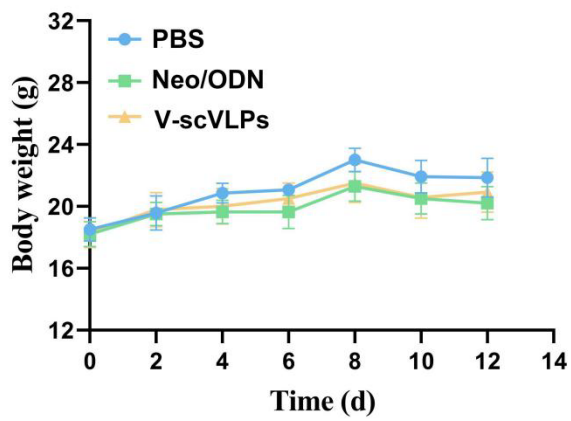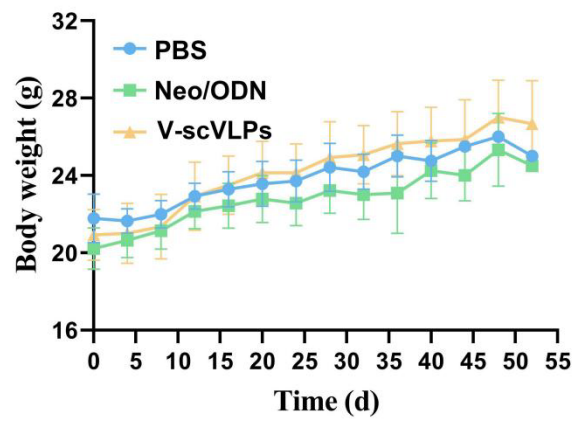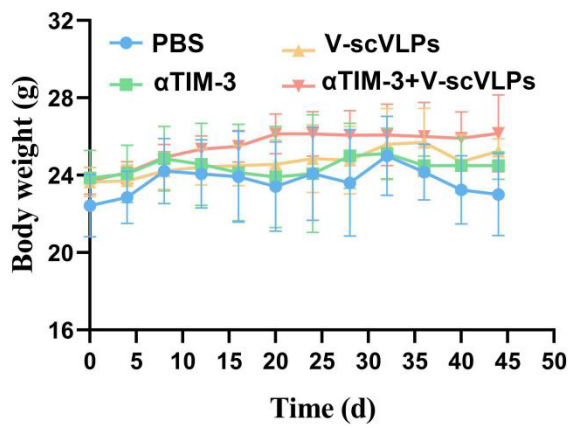

**Figure. S34.** Weight loss of Hepa1-6 tumor-bearing mice during different treatments as indicated. Data are presented as mean  $\pm$  SD (n = 7).



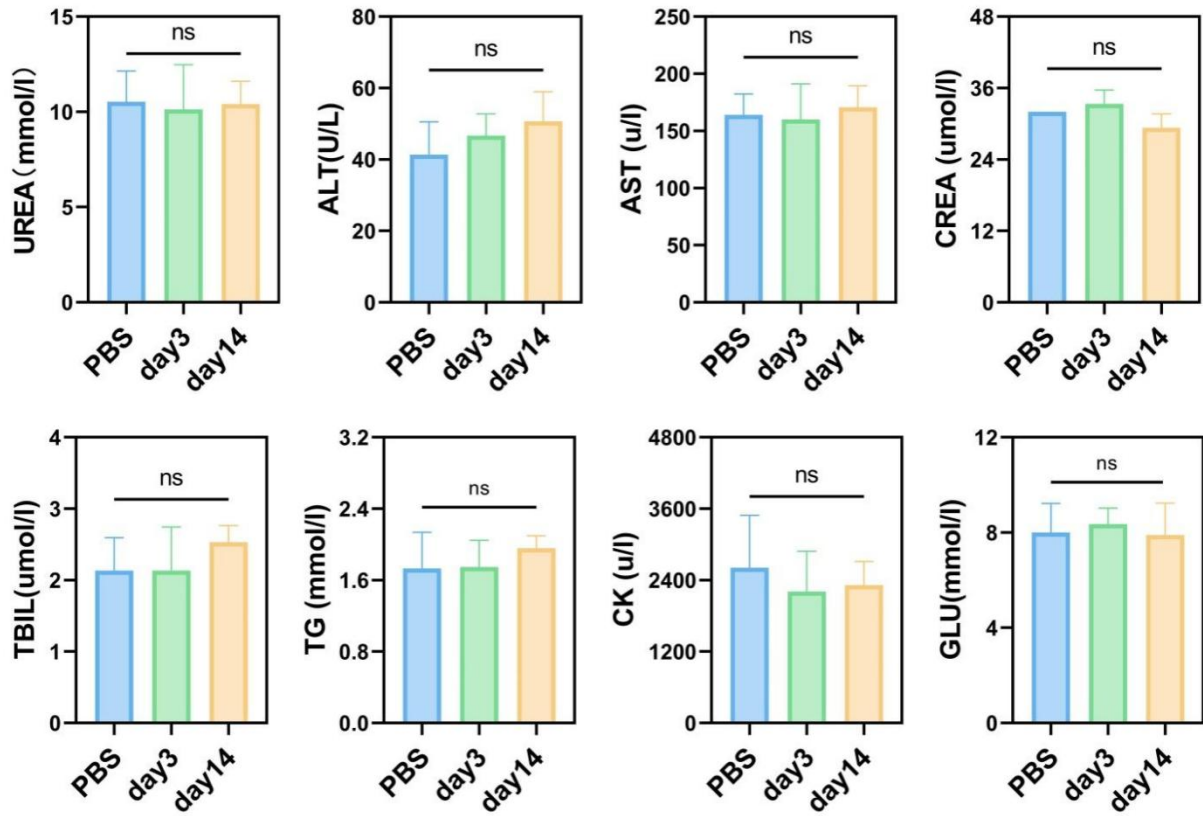

**Figure. S35.** Biochemical analysis (aspartate aminotransferase, AST; alanine aminotransferase, ALT; creatinine, UREA, Serum urea; CREA; total bilirubin, TBIL; thyroglobulin, TG; Alkaline phosphatase, CK; Glucose, GLU) in healthy mice at 3<sup>rd</sup> and 14<sup>th</sup> day after *s.c.* injection of V-scVLPs. Data are presented as mean  $\pm$  SD (n = 3). The statistical analysis was performed with ANOVA analysis.

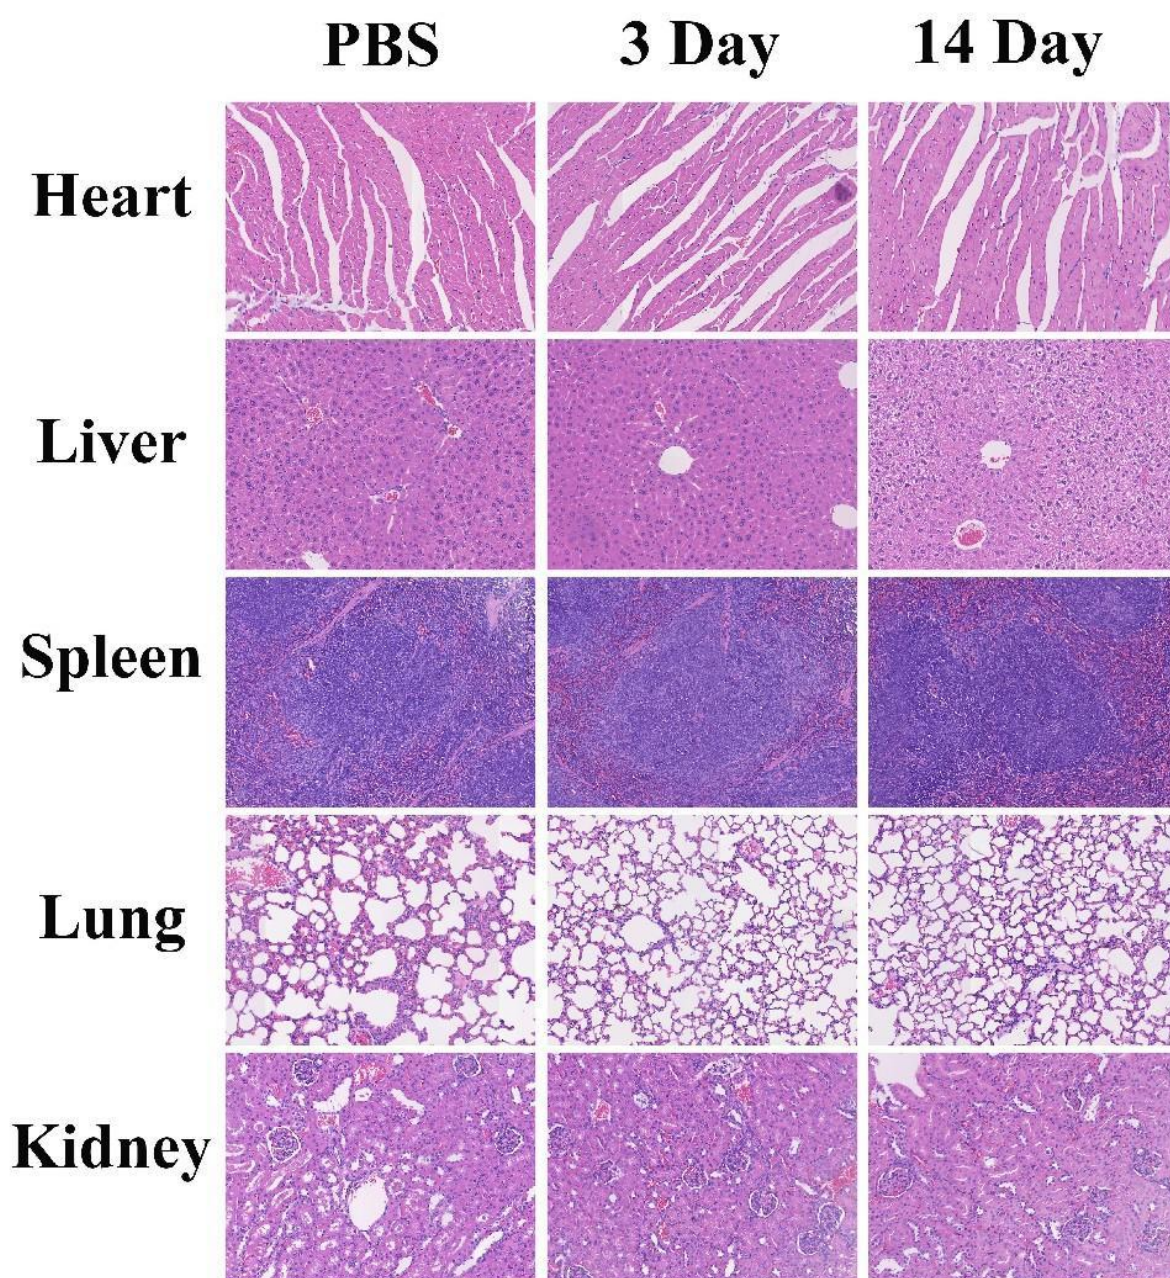

**Figure. S36.** H&E imaging of major organs (heart, spleen, lung and kidney) from healthy mice after *s.c.* injection with V-scVLPs for 3 or 14 days later.
